# Supplementary material for: Physiological effects of five different marine natural organic matters (NOMs) and three different metals (Cu, Pb, Zn) on early life stages of the blue mussel (Mytilus galloprovincialis)
Source: PeerJ journal article supplement (doi:10.7717/peerj.3141), 2017-04-12
Supplement: Supplementary_Figure_S1.pdf [file Supplementary_Figure_S1.pdf]

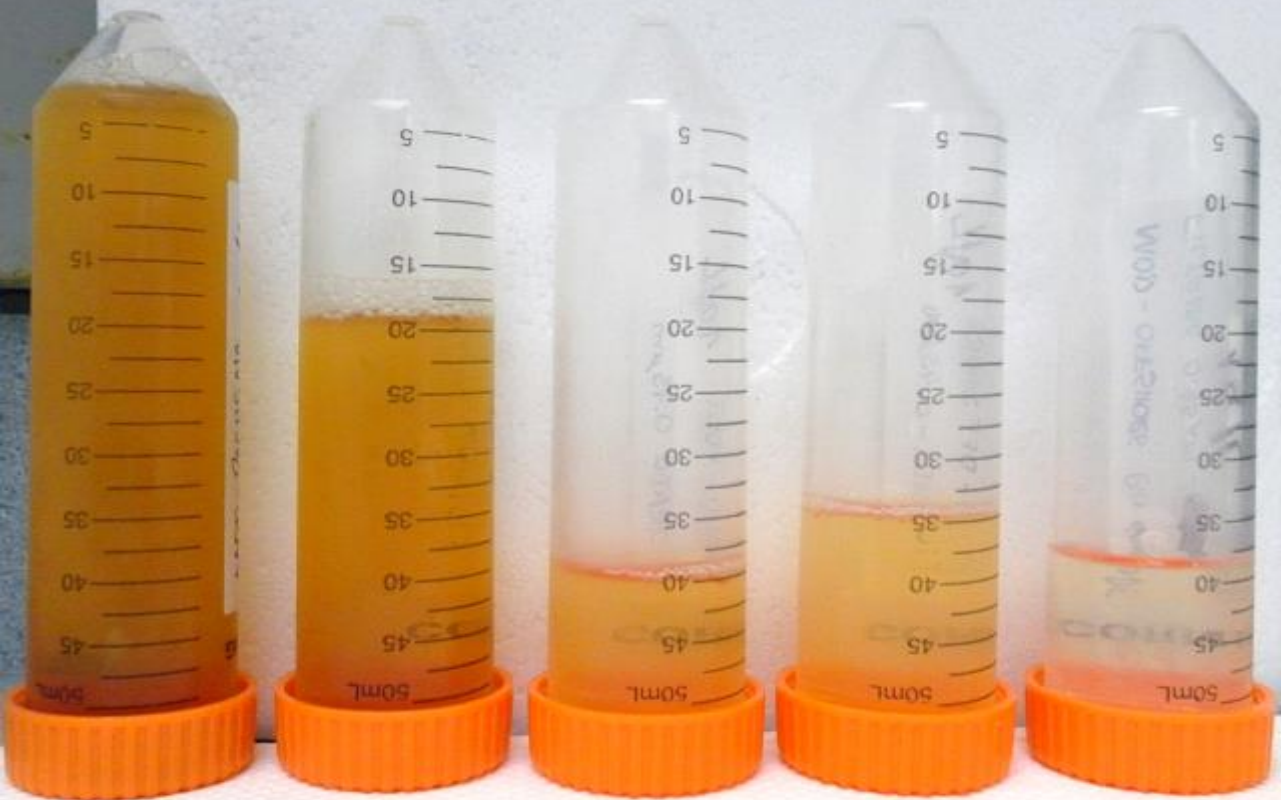

**Pachena**

**Bamfield**

**Port**

**Offshore-CA**

**Offshore-BR**
